# Supplementary material for: Polyphenol characterisation and diverse bioactivities of native Australian lilly pilly (Syzygium paniculatum) extract
Source: Royal Society of Chemistry journal article supplement (doi:10.1039/d2fo01305c), 2022-01-01
Supplement: d2fo01305c1.pdf [file d2fo01305c1.pdf]

Supporting information for

**Polyphenol characterisation and diverse bioactivities of native  
Australian lilly pilly (*Syzygium paniculatum*) extract**

River J Pachulicz<sup>a</sup>, Long Yu<sup>b</sup>, Blagojce Jovcevski<sup>a,b</sup>, Vincent Bulone<sup>b,c</sup>, Tara L Pukala<sup>a,\*</sup>

<sup>a</sup> Department of Chemistry, School of Physical Sciences, University of Adelaide, Adelaide, SA, 5005, Australia

<sup>b</sup> School of Agriculture, Food and Wine, University of Adelaide, Adelaide, SA, 5005, Australia

<sup>c</sup> Division of Glycoscience, Department of Chemistry, School of Engineering Sciences in Chemistry,  
Biotechnology and Health, Royal Institute of Technology (KTH), AlbaNova University Centre, Stockholm,  
Sweden

**\*Corresponding Author**

Department of Chemistry, School of Physical Sciences

University of Adelaide, Adelaide

Australia, 5005

Tel.: +61 8 8313 5497

E-mail: tara.pukala@adelaide.edu.au

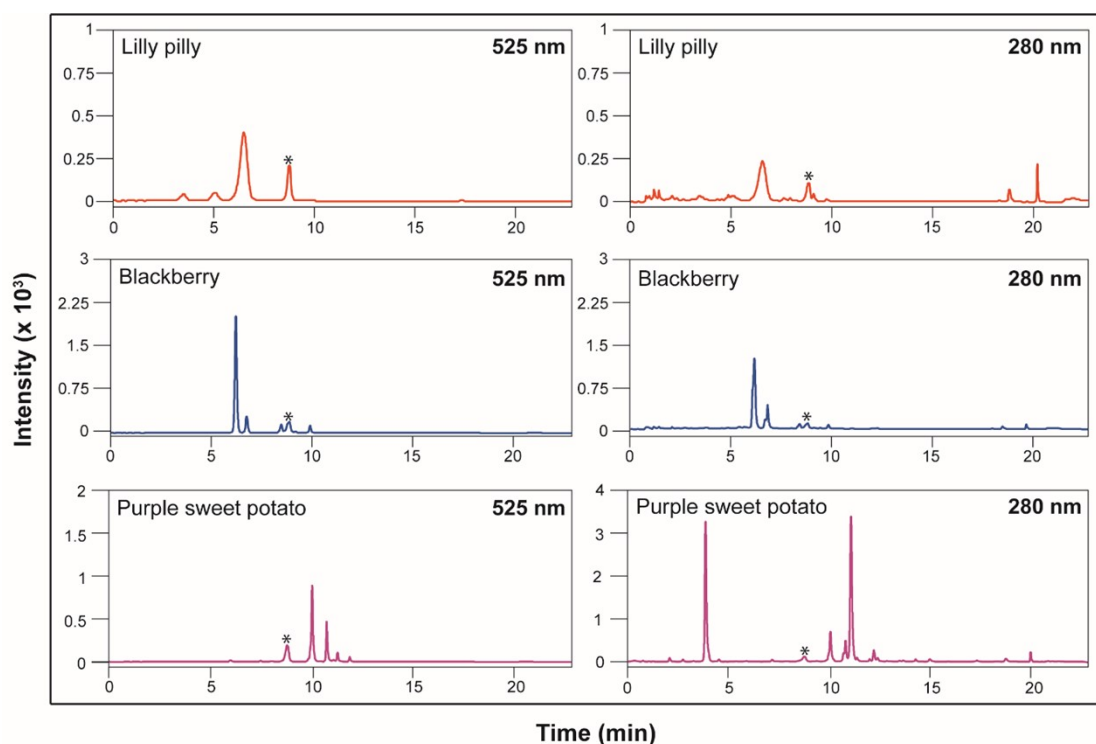

30

31 **Figure S1. HPLC profiles of plant extracts.** Chromatograms of plant extracts from lilly pillly (orange), purple  
 32 sweet potato (pink) and blackberry (blue) measured at 525 nm and 280 nm. Malvidin-3-glucoside internal standard  
 33 (10 ppm) is labelled in each chromatogram (\*). The percentage anthocyanin component of the lilly pillly extract  
 34 at 280 nm was calculated using the ratio between the sum of the integrated peak areas of the identified  
 35 anthocyanins and the sum of the integrated peak areas for all peaks in the extract (not including the internal  
 36 standard). This percentage anthocyanin component was calculated to be 68%.

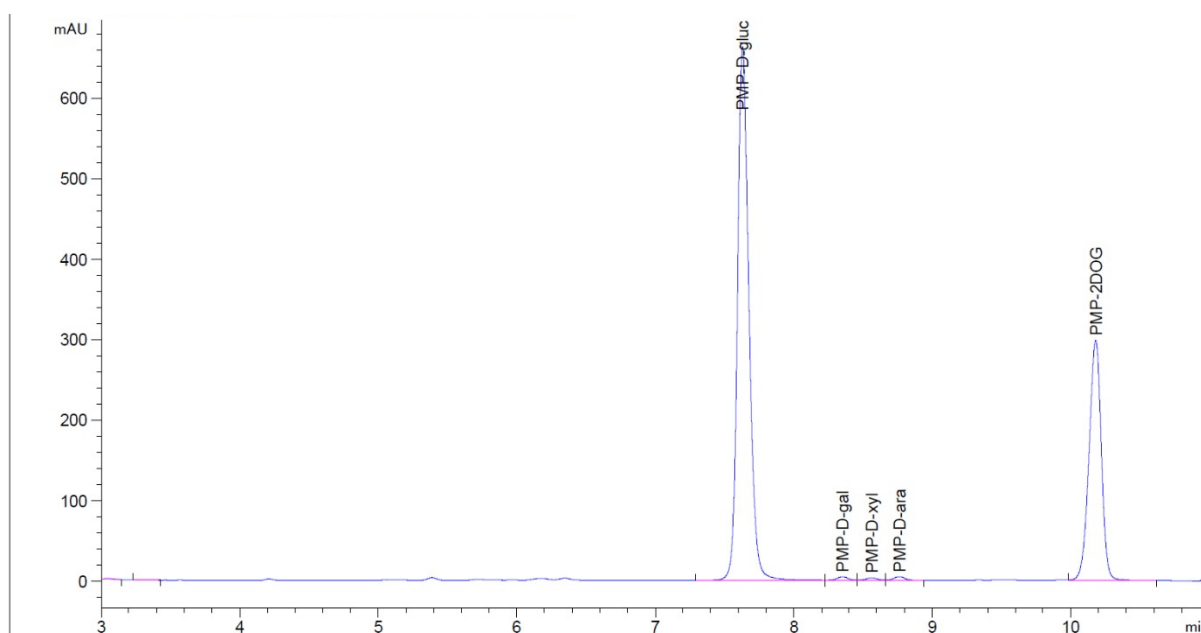

37

38 **Figure S2. Lilly pillly monosaccharide analysis.** Liquid chromatography analysis of monosaccharides from lilly  
 39 pillly extract hydrolysates.

40 **Table S1. Quantification of anthocyanin isoforms in lilly pilly biomass.** Anthocyanins below the limit of  
 41 detection denoted by \*.

| Biomass             | Anthocyanin Isoform                                         | <i>m/z</i> | Amount (mg<br>Cy3Glc/100 g DW)<br>(SEM) |
|---------------------|-------------------------------------------------------------|------------|-----------------------------------------|
| Lilly Pilly         | delphinidin-diglucoside                                     | 627.2      | 24.96 (1.33)                            |
|                     | petunidin-diglucoside                                       | 641.2      | 34.70 (0.49)                            |
|                     | malvidin-diglucoside                                        | 655.2      | 379.20 (11.02)                          |
|                     | <b>Total</b>                                                |            | <b>438.86 (12.84)</b>                   |
| Purple Sweet Potato | cyanidin-3-p-hydroxybenzoylsophoroside-5-glucoside          | 893.2      | 0.92 (0.24)                             |
|                     | peonidin-3-p-hydroxybenzoylsophoroside-5-glucoside          | 907.3      | *                                       |
|                     | cyanidin-3-feruloylsophoroside-5-glucoside                  | 949.3      | *                                       |
|                     | Unknown (cyanidin-based)                                    | 1085.3     | *                                       |
|                     | cyanidin-3-caffeoylcaffeoylsophoroside-5-glucoside          | 1097.2     | *                                       |
|                     | cyanidin-3-caffeoyl-p-hydroxybenzoylsophoroside-5-glucoside | 1055.3     | 200.31 (11.50)                          |
|                     | cyanidin-3-caffeoylferuloylsophoroside-5-glucoside          | 1111.3     | 85.88 (4.54)                            |
|                     | peonidin-3-caffeoyl-p-hydroxybenzoylsophoroside-5-glucoside | 1069.3     | 16.89 (1.03)                            |
|                     | peonidin-3-caffeoylferuloylsophoroside-5-glucoside          | 1125.3     | 6.12 (0.46)                             |
|                     | <b>Total</b>                                                |            | <b>310.12 (17.77)</b>                   |
| Blackberry          | cyanidin-3-glucoside                                        | 449.1      | 565.68 (22.50)                          |
|                     | cyanidin-3-rutinoside                                       | 595.2      | 84.68 (3.48)                            |
|                     | cyanidin-3-xyloside                                         | 419.1      | 39.80 (1.47)                            |
|                     | cyanidin-3-malonylglucoside                                 | 535.1      | 2.57 (0.21)                             |
|                     | cyanidin-3-dioxalylglucoside                                | 593.1      | 29.70 (1.31)                            |
|                     | <b>Total</b>                                                |            | <b>722.42 (28.96)</b>                   |

42

43

44 **Table S2. Thermal stability of anthocyanin-enriched extracts.** Rate constants (*k*) for the thermal degradation  
 45 of anthocyanins from each source at 80 °C, the R<sup>2</sup> of 1<sup>st</sup> order regressions fitted to each plot and the corresponding  
 46 half-lives of anthocyanin thermal degradation are given.

| Biomass | <i>k</i> x 10 <sup>-5</sup> | T <sub>1/2</sub> (h) | R <sup>2</sup> |
|---------|-----------------------------|----------------------|----------------|
|---------|-----------------------------|----------------------|----------------|

|                            | (s <sup>-1</sup> ) |      |       |
|----------------------------|--------------------|------|-------|
| <b>Lilly Pilly</b>         | 4.003              | 4.8  | 0.995 |
| <b>Purple Sweet Potato</b> | 0.7466             | 25.8 | 0.999 |
| <b>Blackberry</b>          | 2.027              | 9.5  | 0.999 |

47

48
